# Supplementary material for: Nanoengineering of a newly designed chlorin e6 derivative for amplified photodynamic therapy via regulating lactate metabolism
Source: Royal Society of Chemistry journal article supplement (doi:10.1039/d1nr01083b), 2021-01-01
Supplement: d1nr01083b1.pdf [file d1nr01083b1.pdf]

## **Electronic Supplementary Information**

### **Nanoengineering of newly designed chlorin e6 derivative for amplified photodynamic therapy via regulating lactate metabolism**

Xiaohan Qin<sup>a</sup>, Mengzhu Zhang<sup>a</sup>, Xu Hu<sup>a</sup>, Qian Du<sup>a</sup>, Zhipeng Zhao<sup>a</sup>, Yue Jiang<sup>a</sup>, Yuxia Luan<sup>\*a</sup>

<sup>a</sup>Department of Pharmaceutics, Key Laboratory of Chemical Biology (Ministry of Education),

School of Pharmaceutical Sciences, Cheeloo College of Medicine, Shandong University, Jinan,

Shandong, 250012, China, E-mail: yuxialuan@sdu.edu.cn

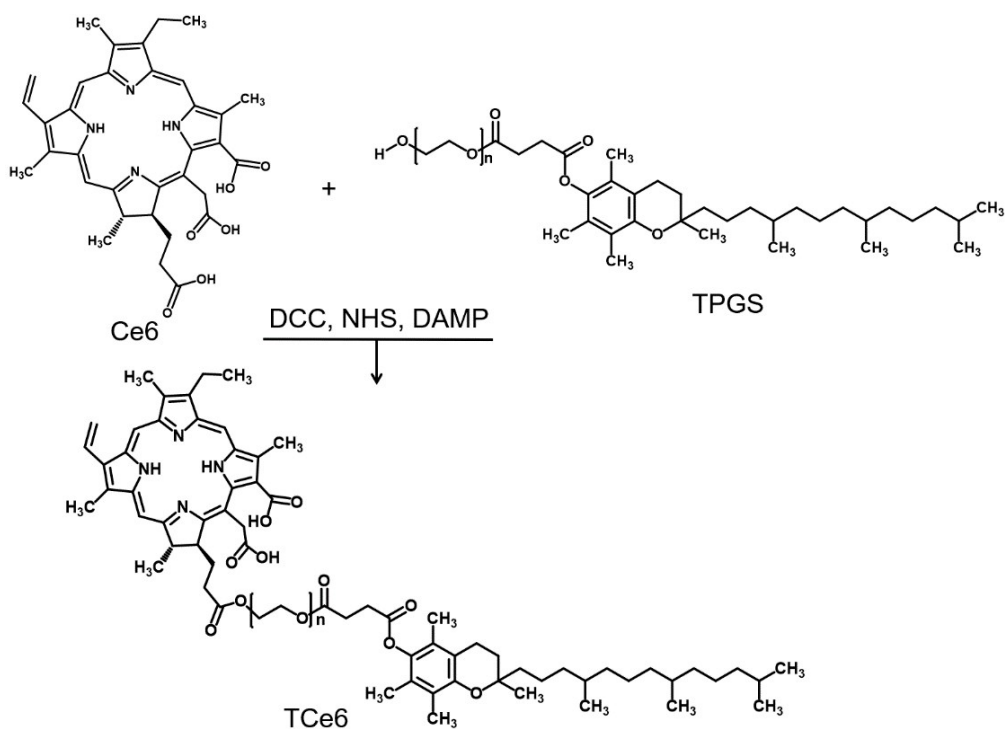

**Figure S1.** Synthetic route of TCE6 conjugate.

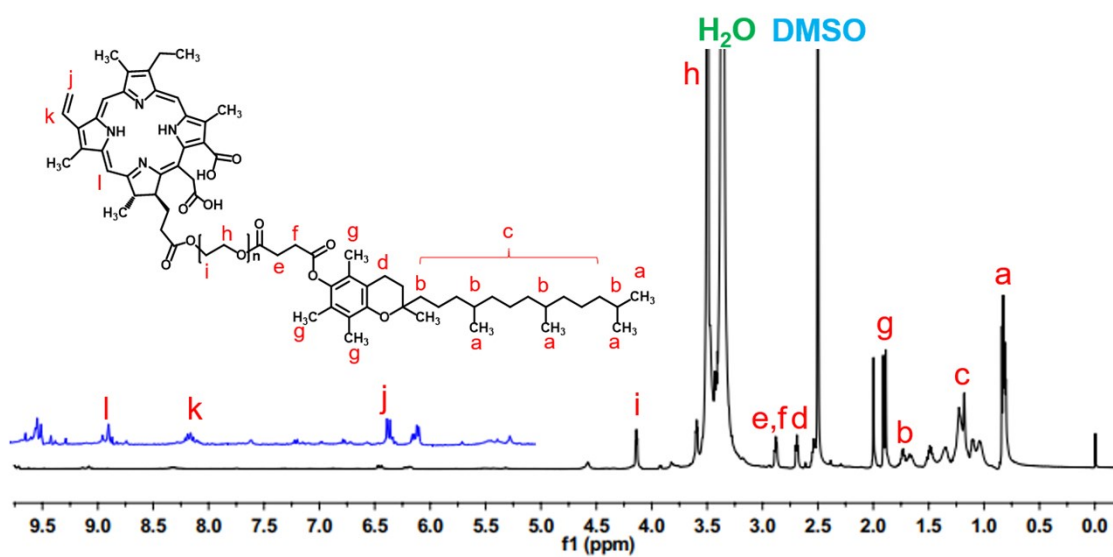

**Figure S2.**  $^1\text{H}$  NMR spectrum of TCE6 conjugate in  $\text{DMSO-}d_6$ .

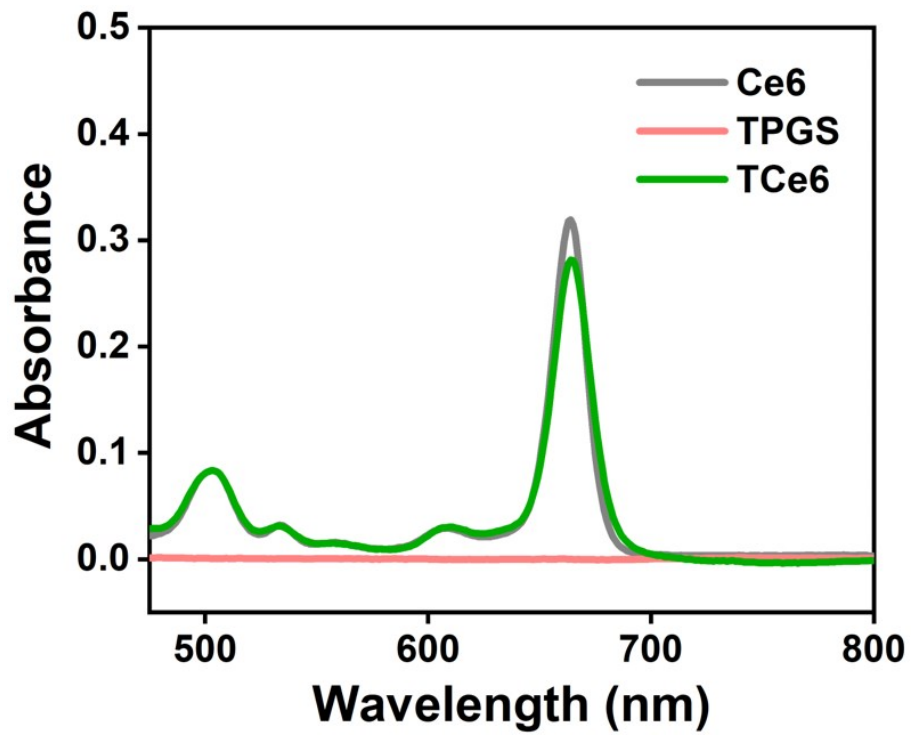

Figure S3. UV-vis spectra of Ce6, TPGS and TCe6.

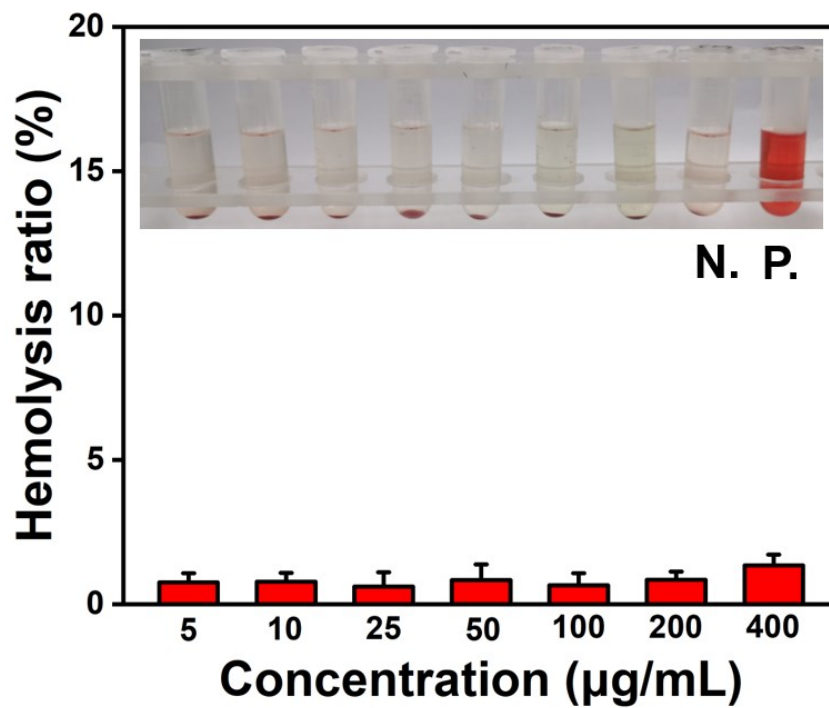

Figure S4. Hemolysis ratios of TCe6/CHC NPs (n = 3).

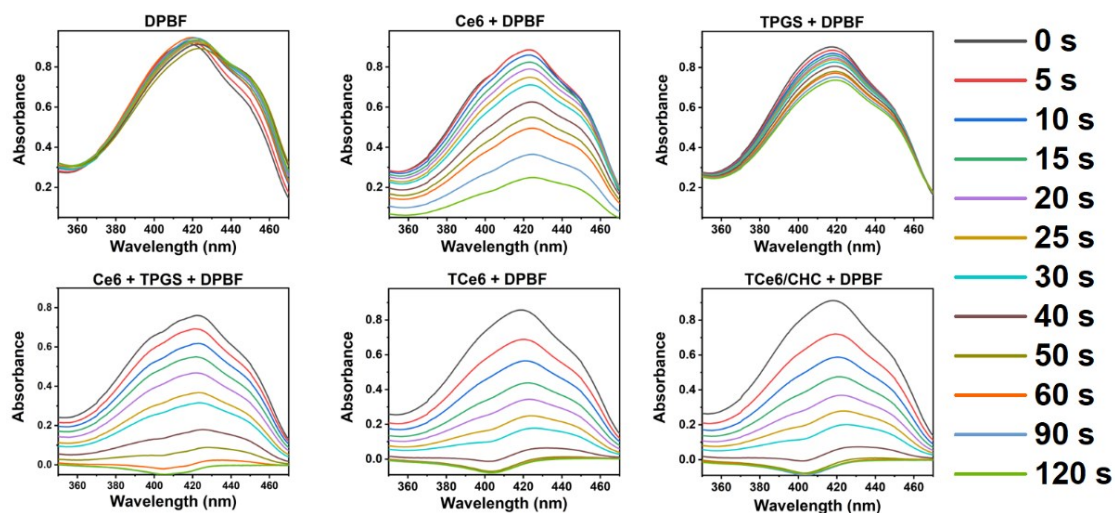

**Figure S5.** Absorbance of DPBF in different groups under 660 nm laser irradiation at a power density of  $100 \text{ mW/cm}^2$  for 120 s.

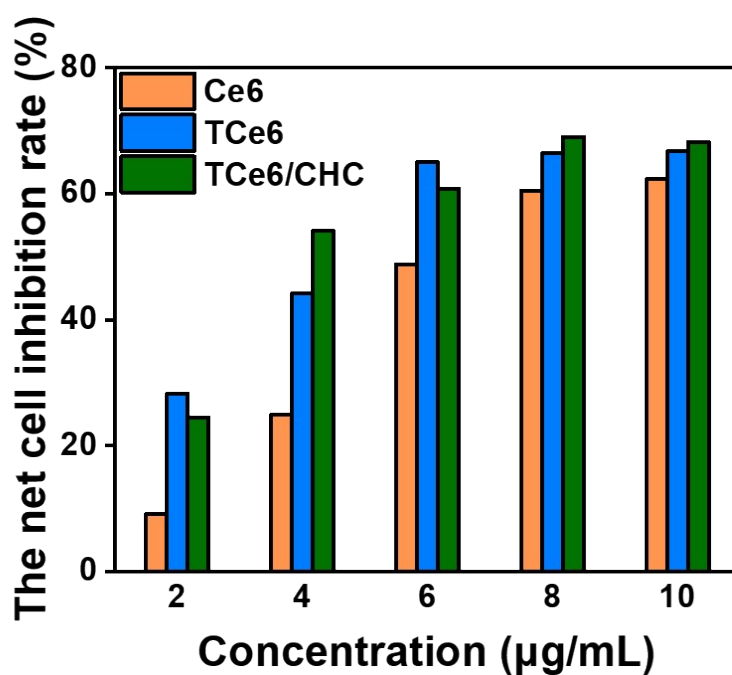

**Figure S6.** The net cell inhibition rate of Ce6, TCe6 NPs and TCe6/CHC NPs (Ce6 concentration: 2 to 10 µg/mL).

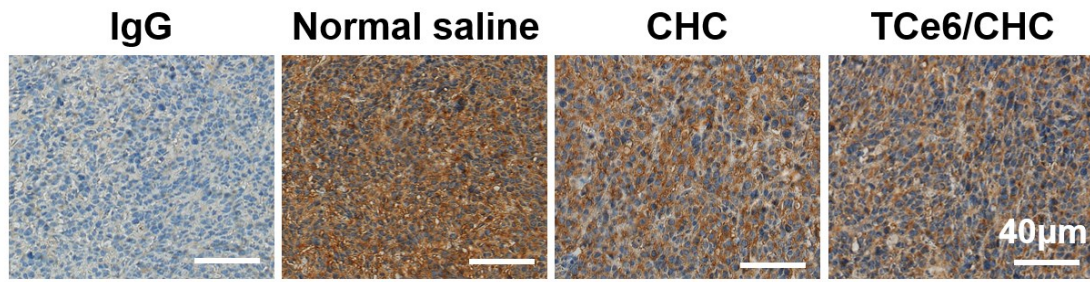

**Figure S7.** Immunohistochemistry of MCT1 expression in the CT26 tumor after the treatment by normal saline, CHC, TCe6/CHC NPs. The IgG group is a negative control group, and 5% BSA is incubated as a negative control instead of MCT1 antibody. Blue color refers to nucleus, and brown color is MCT1. Scale bar = 40 μm.
